# Supplementary material
Source: MDPI journal article supplement (https://www.mdpi.com/2311-553X/8/1/20)
Supplement: s1 [file s1]

**A**

### Free 6S-1 RNA

6S-1 RNAfold\_Centroid\_structure (37°C, default parameters), A134-U150 unpaired, 5'-CB unstructured

[illegible]

Color code: P2, 5'-CB, P3, 3'-CB\_HP,

**B**

## 6S-1 RNA:pRNA 14-mer complex

6S-1 RNA pRNA 14-mer pseudoknot, Linker 25 x C, CBCH long, A134-U150 unpaired

[illegible]

Color code: pRNA 14-mer, pRNA target sequence, P3, 3'-CB\_HP, CBCH\_long

artificial linker sequence (25 C residues); [...], bracket annotation for artificial pseudoknot

**Figure S4: Secondary structure dot-bracket notation of (A) free 6S-1 RNA and (B) the 6S-1 RNA:pRNA 14-mer complex that were used as templates for 3D predictions by RNAcomposer.** For colored structural elements, see Fig. 1 of the main text. For RNAcomposer prediction of the 6S-1:pRNA complex, the 6S-1 RNA sequence was extended at the 5'-end by a linker sequence (here 25 C residues) and the pRNA sequence; very similar results were obtained with U25, A25 or G25 linkers and longer homopolymeric linkers of 50, 75 or 100 nt.
