# Supplementary material
Source: MDPI journal article supplement (https://www.mdpi.com/2311-553X/8/1/20)
Supplement: s1 [file s1]

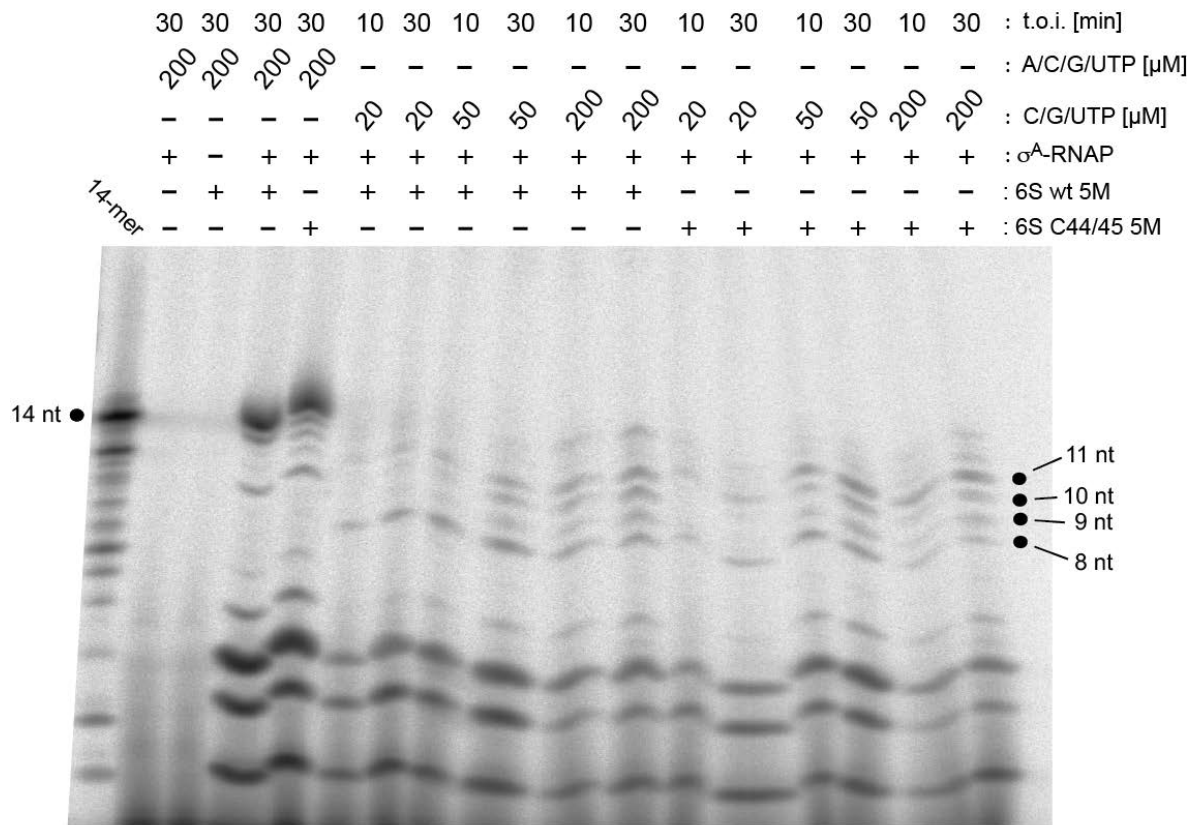

**Figure S3: pRNA transcription by SG7  $\sigma^A$ -RNAP using 6S RNAs wt 5M and C44/45 5M as templates.** The figure illustrates that the pRNA 8-mer appears first after short incubation (10 min) and at low C/G/UTP concentrations (20  $\mu$ M each), but longer pRNA products appear under ATP omission conditions upon longer incubation periods and at higher nucleotide concentrations. The longer products can be explained by misincorporation C, G or U instead of the encoded A at position 9. For more details see Fig. 11 and Materials and Methods of the main text.
