# Supplementary material
Source: MDPI journal article supplement (https://www.mdpi.com/2311-553X/8/1/20)
Supplement: s1 [file s1]

**6S-1 RNA alone** (image #186131): slim elongated molecules #1 and 2 were primarily observed with free 6S-1 RNA

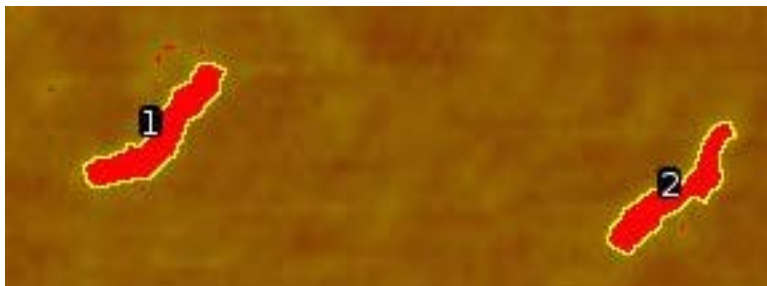

**6S-1 RNA alone** (image #2711123), strongly bent molecules (#133) rarely observed:

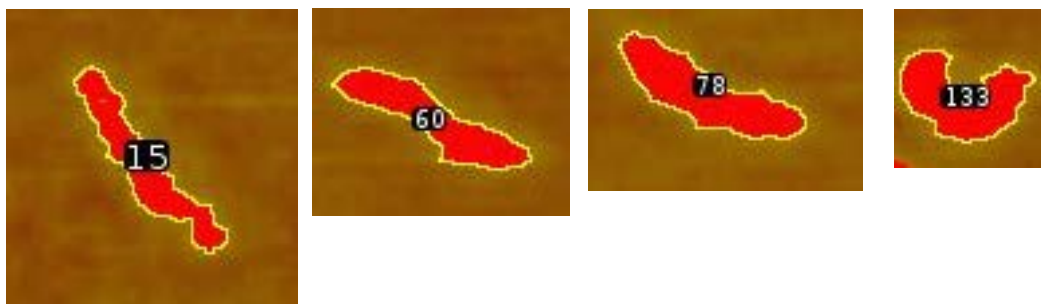

**6S-1 RNA alone** (image #2711124), other examples:

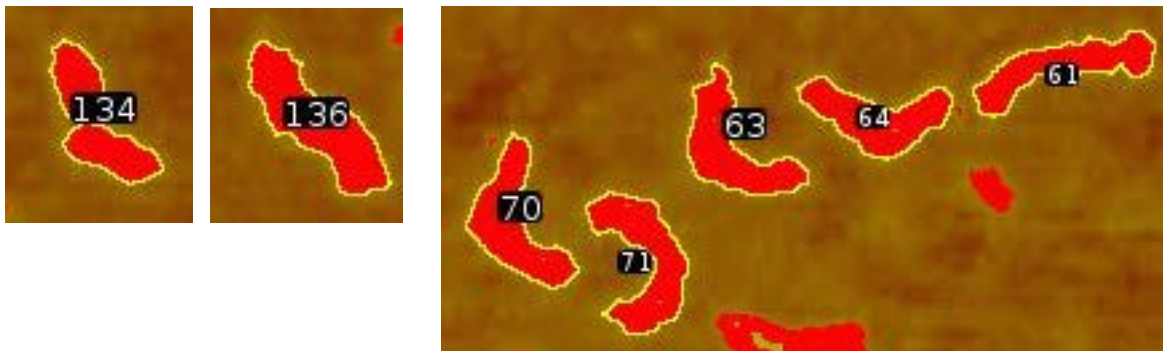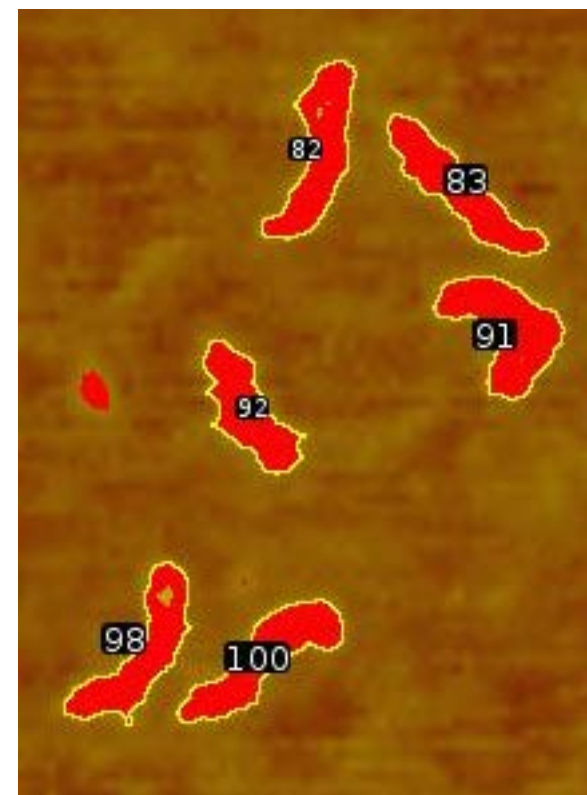

**6S-1 RNA alone** (image #2711126), other examples; shape of molecules #56 and 106 rarely observed:

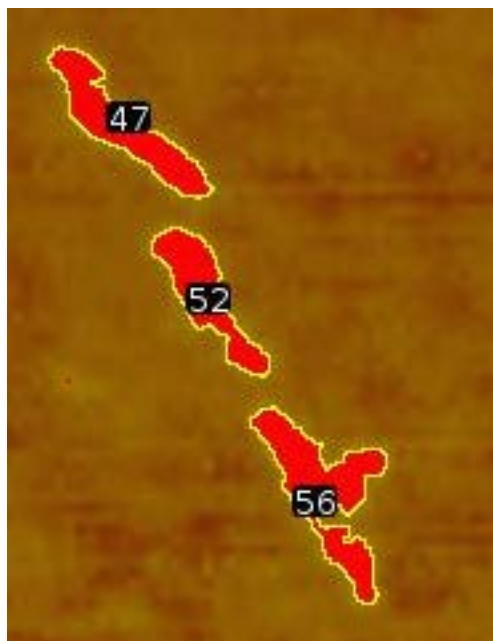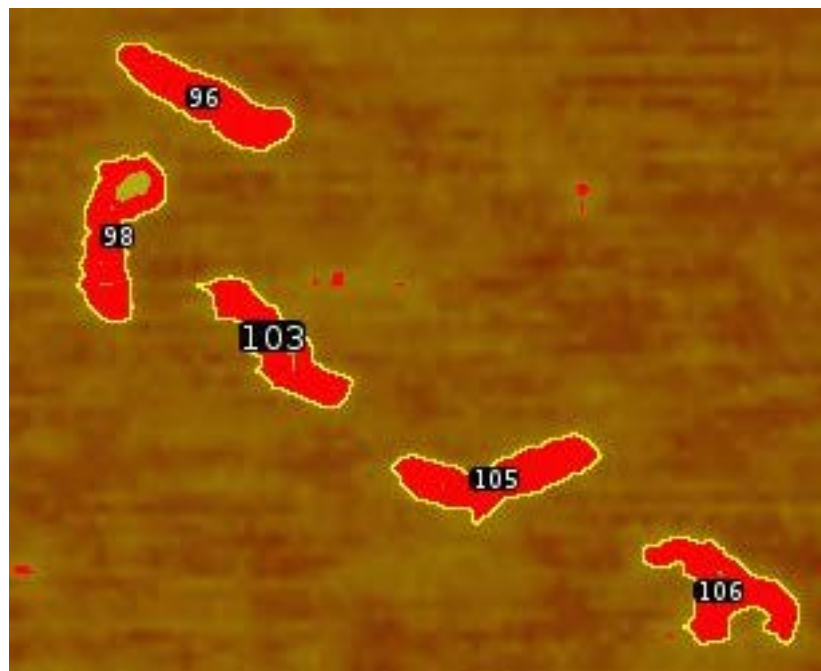

**6S-1 RNA complexes with pLNA 14-mer** (image #186133) appear mostly thicker when elongated (molecules #1 und 8), only few slim molecules (#15):

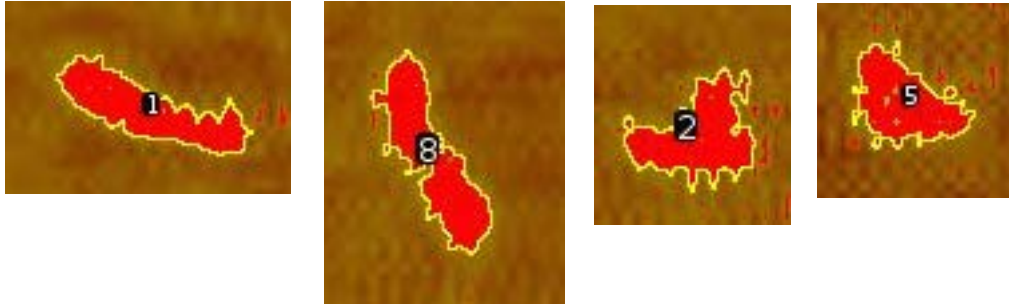

**6S-1 RNA complexes with pLNA 14-mer** (Image #186139) reveals thicker molecules with three protuberances (#9, 15, 16, 23, 24)

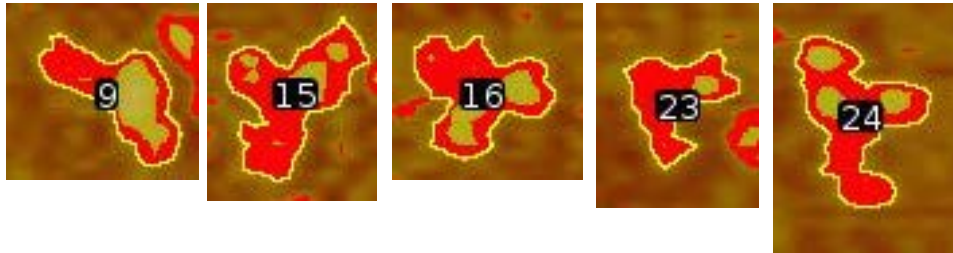

or molecules #9 and 13 in image #186137:

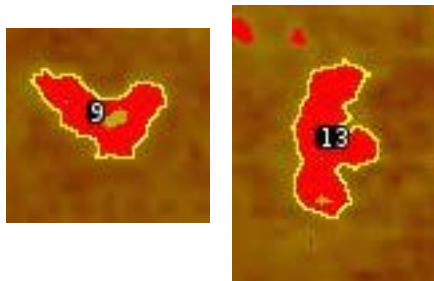

or molecules #8, 9, 10 (image #186134), molecule #4 strongly bent:

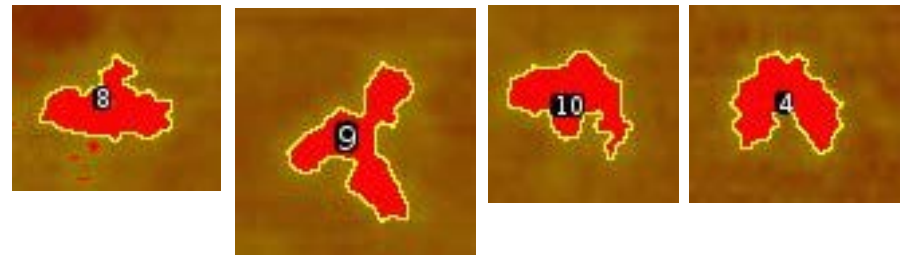

6S-1 RNA complexes with pLNA 8-mer (#27111211)

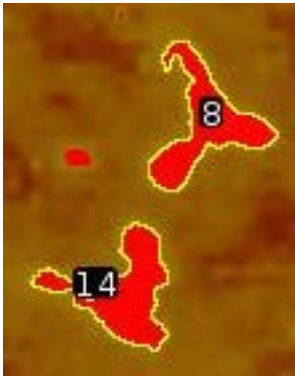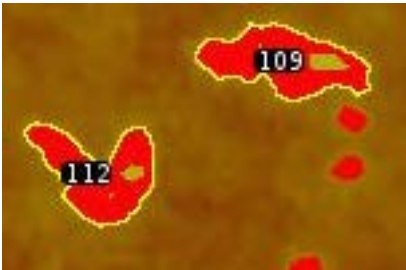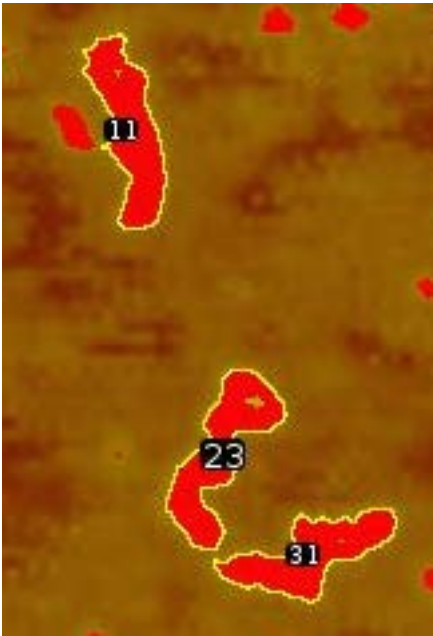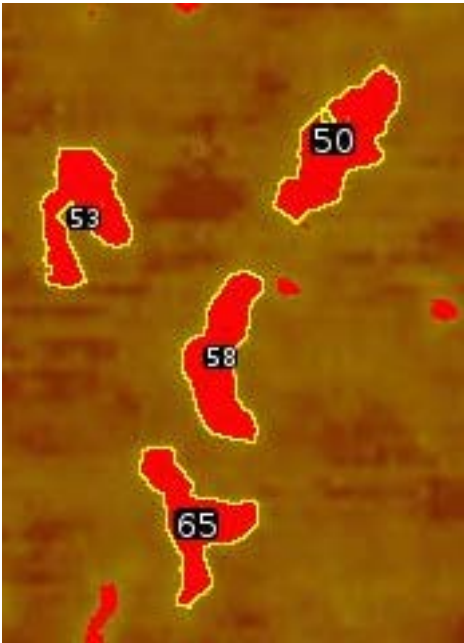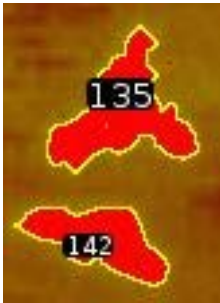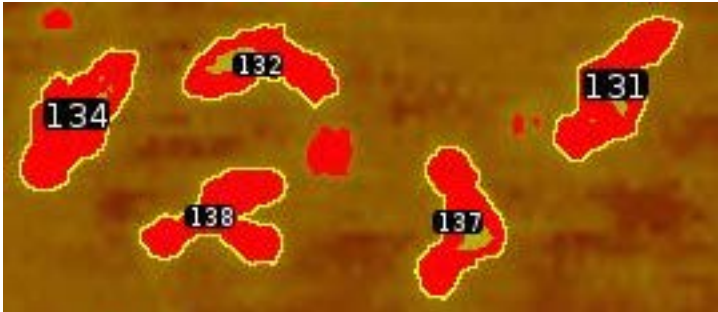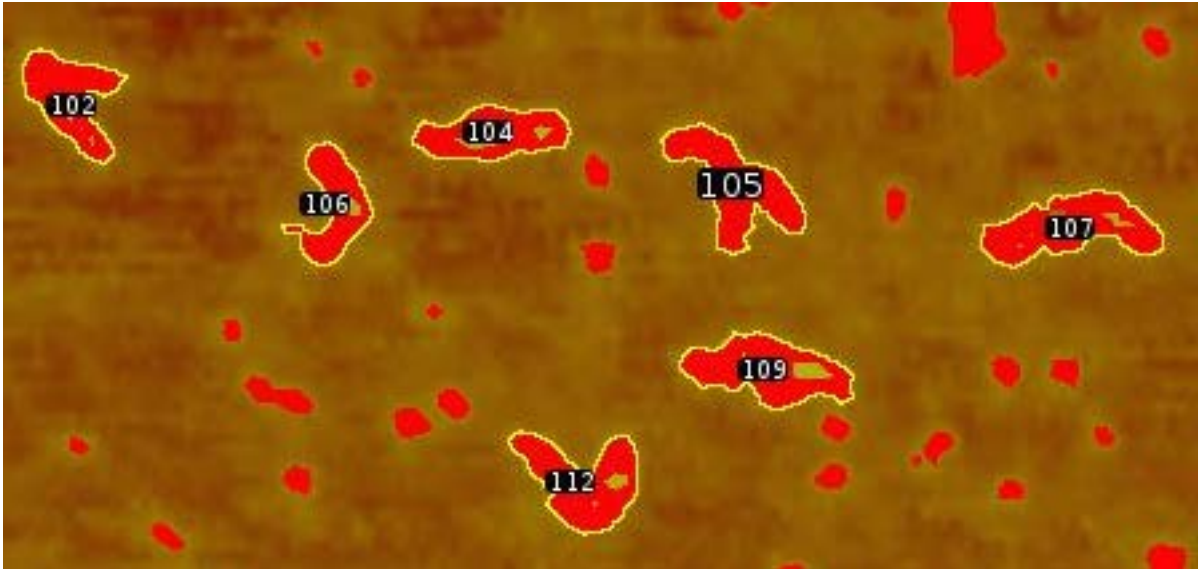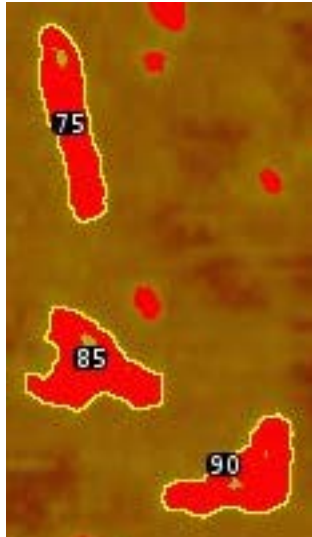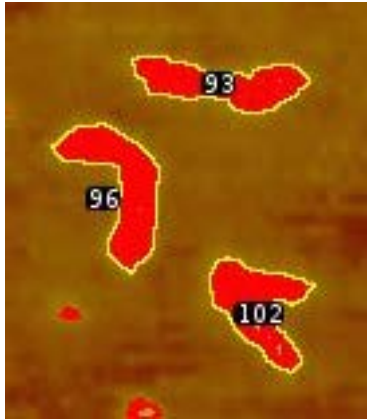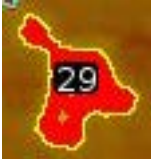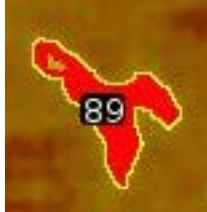

# 6S-1 RNA complexes with pLNA 8-mer (#27111210)

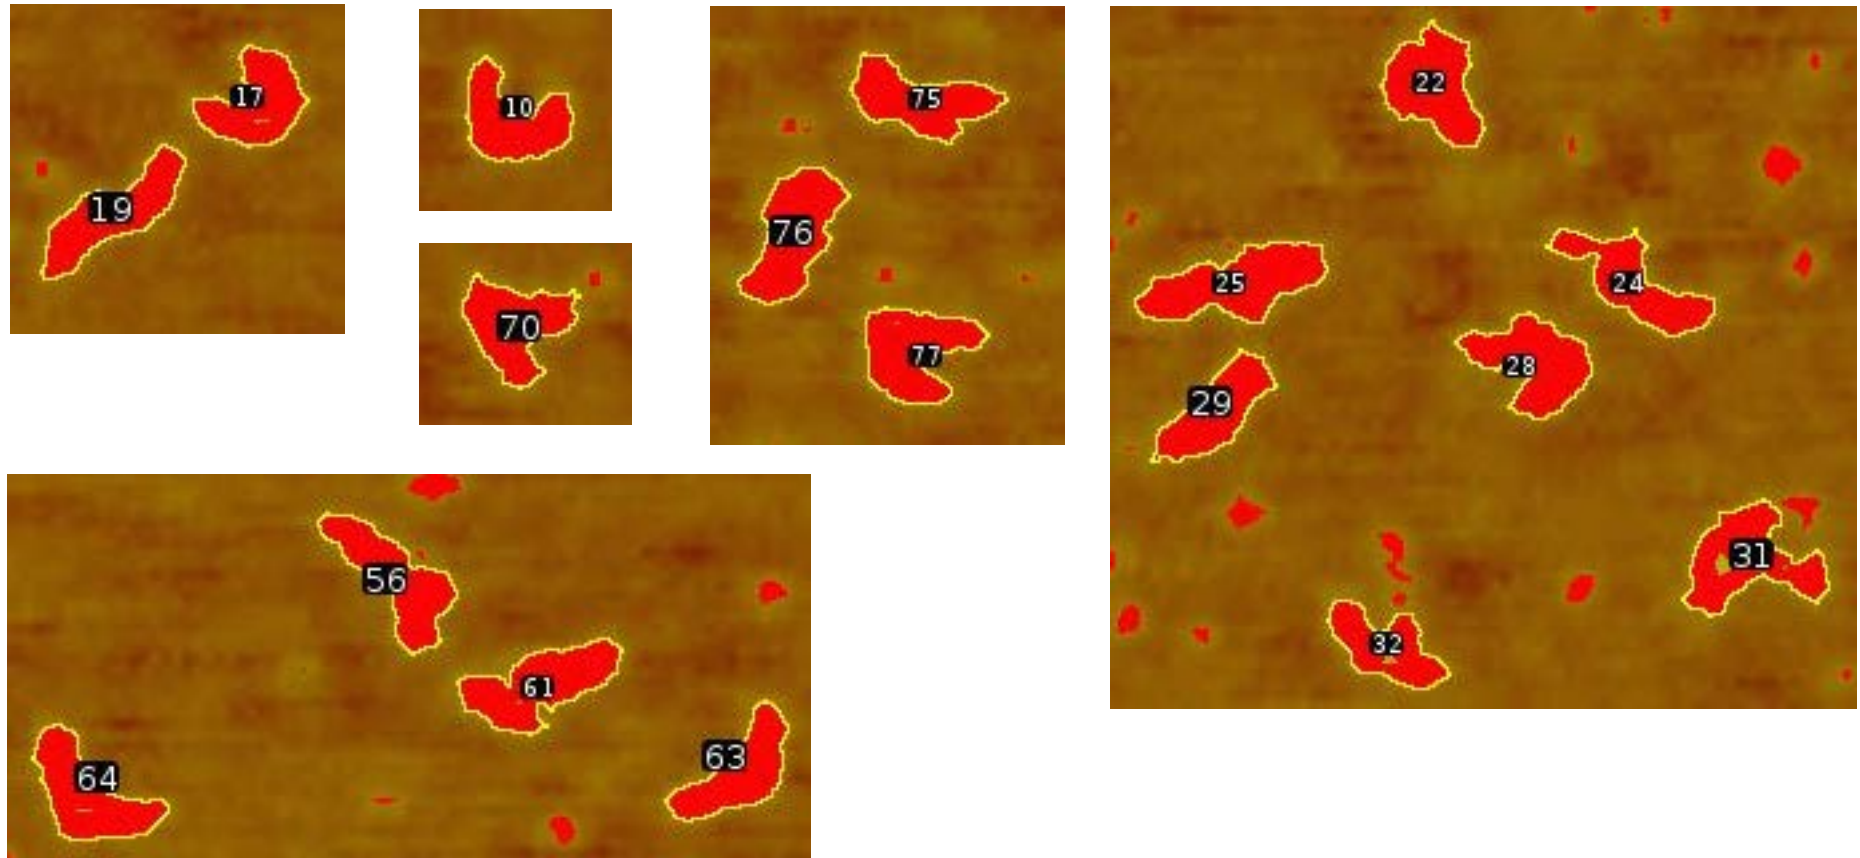

**Figure S4. Example AFM images of free 6S-1 RNA and 6S-1 RNA complexes with pLNA 8- and 14-mers.** The overall impression (upon visual inspection) is that upon annealing of the pLNA 8- and 14-mers, increasingly bent, thicker and shorter molecules appear, often with three protuberances of about equal lengths. Slim elongated molecules are more abundant in images of free 6S-1 RNA. These trends are in line with the results of the automated, quantitative molecule shape analysis presented in Fig. 13D.
